# Supplementary material for: Associations between circulating levels of FABP4 and TNF receptors are more evident in patients with type 2 diabetes mellitus than in patients with type 1 diabetes mellitus
Source: PubMed Central journal article supplement — Endocr Connect. 2024 Oct 14;13(11):e240343. doi: 10.1530/EC-24-0343 (PMC11562683; doi:10.1530/ec-24-0343), 2024-10-14
Supplement: supplementary_material.pdf [file supplementary_material.pdf]

## Supplementary Figure S1

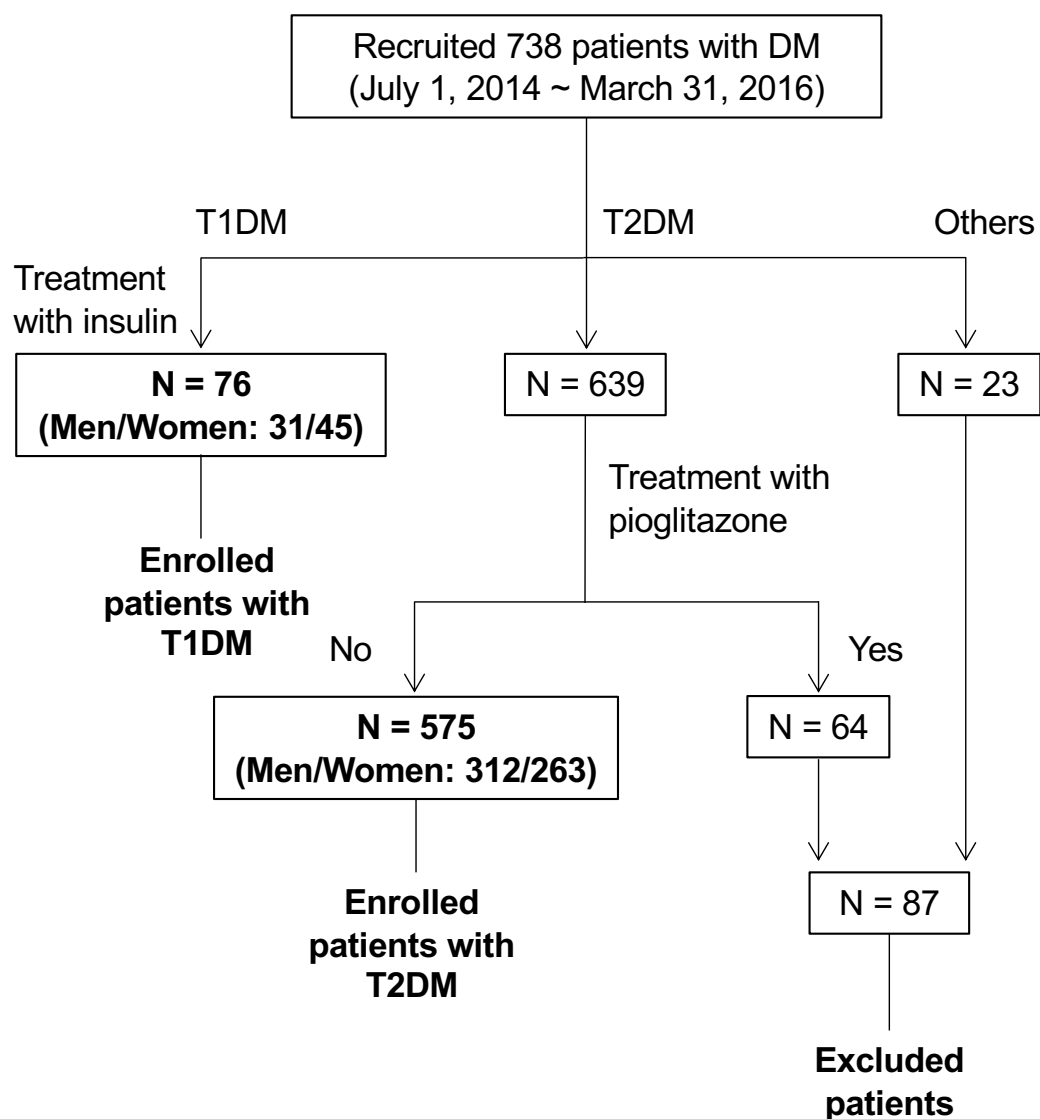

### Supplementary Figure S1. Selection of study participants.

Among 738 patients with diabetes mellitus (DM), a total of 76 patients with type 1 DM (T1DM, n = 76) and type 2 DM (T2DM, n = 575) were finally recruited for analyses in the present study.

## Supplementary Table S1

Supplementary Table S1. Characteristics of the enrolled and excluded patients

|                                 | Enrolled<br>n = 651 | Excluded<br>n = 87 | P       |
|---------------------------------|---------------------|--------------------|---------|
| Age, years                      | 65 ± 13             | 64 ± 13            | 0.573   |
| Sex, Men                        | 343 (52.7)          | 55 (63.2)          | 0.068   |
| BMI                             | 24.7 ± 4.4          | 25.5 ± 5.4         | 0.101   |
| Systolic BP, mmHg               | 139 ± 18            | 136 ± 19           | 0.115   |
| Diastolic BP, mmHg              | 78 ± 12             | 76 ± 12            | 0.253   |
| Heart rate, per minute          | 81 ± 14             | 80 ± 13            | 0.491   |
| Current smoking habit           | 109 (17.0)          | 14 (16.3)          | 0.998   |
| Alcohol drinking habit          | 162 (25.3)          | 16 (18.6)          | 0.229   |
| Duration of DM, years           | 14 [6-22]           | 15 [9-20]          | 0.776   |
| Family history                  |                     |                    |         |
| DM                              | 375 (57.6)          | 50 (57.5)          | 0.999   |
| Comorbidity                     |                     |                    |         |
| Hypertension                    | 375 (57.6)          | 50 (57.5)          | 0.702   |
| Cardiovascular disease          | 224 (34.5)          | 30 (34.5)          | 1.000   |
| Medication                      |                     |                    |         |
| Anti-diabetic drugs             |                     |                    |         |
| Insulin                         | 288 (44.2)          | 26 (29.9)          | 0.011   |
| GLP-1 analogs                   | 32 (4.9)            | 2 (2.3)            | 0.414   |
| Sulfonylureas                   | 166 (25.5)          | 41 (47.1)          | < 0.001 |
| Biguanides                      | 320 (49.2)          | 46 (52.9)          | 0.569   |
| α-glucosidase inhibitors        | 100 (15.4)          | 23 (26.4)          | 0.014   |
| DPP-4 inhibitors                | 432 (66.4)          | 59 (67.8)          | 0.904   |
| Glinides                        | 49 (7.5)            | 5 (5.7)            | 0.665   |
| SGLT2 inhibitors                | 10 (1.5)            | 1 (1.1)            | 0.998   |
| Anti-dyslipidemic drugs         |                     |                    |         |
| Statin                          | 331 (50.8)          | 57 (65.5)          | 0.012   |
| Biochemical data                |                     |                    |         |
| Total protein, g/dL             | 7.3 ± 0.5           | 7.3 ± 0.5          | 0.690   |
| AST, IU/L                       | 21 [17-27]          | 19 [16-26]         | 0.114   |
| ALT, IU/L                       | 19 [14-28]          | 17 [13-26]         | 0.473   |
| γGTP, IU/L                      | 25 [17-46]          | 27 [19-40]         | 0.925   |
| BUN, mg/dL                      | 17 ± 8              | 16 ± 4             | 0.418   |
| Creatinine, mg/dL               | 0.80 [0.64-1.00]    | 0.80 [0.60-1.00]   | 0.760   |
| eGFR, mL/min/1.73m <sup>2</sup> | 67 ± 23             | 71 ± 24            | 0.154   |
| Uric acid, mg/dL                | 5.3 ± 1.4           | 5.3 ± 1.5          | 0.804   |
| TC, mg/dL                       | 183 ± 35            | 181 ± 36           | 0.629   |
| LDL-C, mg/dL                    | 106 ± 28            | 104 ± 23           | 0.423   |
| HDL-C, mg/dL                    | 53 ± 15             | 55 ± 13            | 0.248   |
| Non-HDL-C, mg/dL                | 130 ± 33            | 126 ± 29           | 0.301   |
| Triglycerides, mg/dL            | 104 [74-158]        | 94 [76-155]        | 0.675   |
| CRP, mg/dL                      | 0.10 [0.06-0.20]    | 0.08 [0.06-0.15]   | 0.170   |
| Glucose, mg/dL                  | 141 [118-175]       | 142 [121-167]      | 0.939   |
| Hemoglobin A1c, %               | 7.2 [6.6-7.9]       | 7.2 [6.6-7.8]      | 0.822   |
| C-peptide, ng/mL                | 1.52 [0.94-2.46]    | 1.49 [0.96-2.58]   | 0.746   |
| TNFR1, ng/mL                    | 1.58 [1.25-2.16]    | 1.52 [1.29-2.01]   | 0.545   |
| TNFR2, ng/mL                    | 3.38 [2.70-4.52]    | 3.40 [2.75-4.23]   | 0.747   |
| FABP4, ng/mL                    | 16.5 [11.5-23.8]    | 24.2 [16.3-33.5]   | < 0.001 |

Variables are expressed as number (%), means ± standard deviation or medians [interquartile ranges].

ALT, alanine transaminase; AST, aspartate transaminase; BMI, body mass index; BP, blood pressure; BUN, blood urea nitrogen; CRP, C-reactive protein; DM, diabetes mellitus; DPP-4, dipeptidyl peptidase-4; eGFR, estimated glomerular filtration rate; FABP4, fatty acid-binding protein 4; GLP-1, glucagon-like peptide-1; γGTP, γ-glutamyl transpeptidase; HDL-C, high-density lipoprotein cholesterol; LDL-C, low-density lipoprotein cholesterol; SGLT2, sodium-glucose co-transporter-2; TC, total cholesterol; TNFR, tumor necrosis factor receptor; T1DM, type 1 diabetes mellitus; T2DM, type 2 diabetes mellitus.

## Supplementary Table S2

Supplementary Table S2. Characteristics of the enrolled patients with DM divided by sex

|                                 | T1DM             |                  | T2DM             |                  |
|---------------------------------|------------------|------------------|------------------|------------------|
|                                 | Men (n = 31)     | Women (n =45)    | Men (n = 312)    | Women (n = 263)  |
| Age, years                      | 60 ± 13          | 59 ± 15          | 66 ± 12          | 65 ± 14          |
| BMI                             | 23 ± 3           | 23 ± 4           | 24 ± 4           | 25 ± 5           |
| Systolic BP, mmHg               | 135 ± 15         | 134 ± 18         | 139 ± 18         | 140 ± 18         |
| Diastolic BP, mmHg              | 81 ± 9           | 74 ± 12          | 79 ± 12          | 77 ± 11          |
| Heart rate, per minute          | 81 ± 14          | 81 ± 13          | 80 ± 14          | 83 ± 14          |
| Current smoking habit           | 8 (25.8)         | 2 (4.7)          | 80 (25.8)        | 19 (7.4)         |
| Alcohol drinking habit          | 16 (51.6)        | 1 (2.3)          | 125 (40.3)       | 20 (7.8)         |
| Duration of DM, years           | 12 [6-20]        | 15 [6-27]        | 15 [7-22]        | 13 [7-22]        |
| Family history                  |                  |                  |                  |                  |
| DM                              | 13 (41.9)        | 23 (51.1)        | 169 (54.2)       | 170 (64.6)       |
| Comorbidity                     |                  |                  |                  |                  |
| Hypertension                    | 20 (64.5)        | 27 (60.0)        | 229 (73.4)       | 193 (73.4)       |
| Cardiovascular disease          | 6 (19.4)         | 9 (20.0)         | 132 (42.3)       | 77 (29.4)        |
| Medication                      |                  |                  |                  |                  |
| Anti-diabetic drugs             |                  |                  |                  |                  |
| Insulin                         | 31 (100)         | 45 (100)         | 122 (39.1)       | 90 (34.2)        |
| GLP-1 analogs                   | 1 (3.1)          | 0 (0)            | 14 (4.5)         | 17 (66.5)        |
| Sulfonylureas                   | 0 (0)            | 0 (0)            | 82 (26.3)        | 84 (31.9)        |
| Biguanides                      | 5 (16.1)         | 6 (13.3)         | 155 (49.7)       | 154 (58.6)       |
| α-glucosidase inhibitors        | 2 (6.5)          | 3 (6.7)          | 54 (17.3)        | 41 (15.6)        |
| DPP-4 inhibitors                | 6 (19.4)         | 12 (26.7)        | 225 (72.1)       | 189 (71.9)       |
| Glinides                        | 0 (0)            | 0 (0)            | 31 (9.9)         | 18 (6.8)         |
| SGLT2 inhibitors                | 0 (0)            | 0 (0)            | 5 (1.6)          | 5 (1.9)          |
| Anti-dyslipidemic drugs         |                  |                  |                  |                  |
| Statin                          | 8 (25.8)         | 21 (46.7)        | 154 (49.4)       | 148 (56.3)       |
| Biochemical data                |                  |                  |                  |                  |
| Total protein, g/dL             | 7.0 ± 0.4        | 7.3 ± 0.4        | 7.3 ± 0.5        | 7.3 ± 0.5        |
| AST, IU/L                       | 22 [19-26]       | 20 [16-25]       | 22 [17-29]       | 21 [17-26]       |
| ALT, IU/L                       | 19 [15-25]       | 16 [11-22]       | 20 [14-29]       | 18 [13-28]       |
| γGTP, IU/L                      | 28 [18-53]       | 16 [12-26]       | 30 [20-55]       | 22 [16-36]       |
| BUN, mg/dL                      | 17 ± 7           | 18 ± 7           | 18 ± 9           | 16 ± 7           |
| Creatinine, mg/dL               | 0.80 [0.72-0.90] | 0.70 [0.60-0.80] | 0.90 [0.80-1.10] | 0.64 [0.57-0.80] |
| eGFR, mL/min/1.73m <sup>2</sup> | 73 ± 18          | 68 ± 28          | 64 ± 21          | 70 ± 25          |
| Uric acid, mg/dL                | 5.4 ± 1.2        | 4.3 ± 1.5        | 5.7 ± 1.3        | 5.0 ± 1.2        |
| TC, mg/dL                       | 189 ± 31         | 193 ± 29         | 177 ± 36         | 187 ± 33         |
| LDL-C, mg/dL                    | 108 ± 25         | 114 ± 21         | 102 ± 29         | 110 ± 27         |
| HDL-C, mg/dL                    | 65 ± 16          | 62 ± 17          | 49 ± 14          | 54 ± 13          |
| Non-HDL-C, mg/dL                | 121 ± 26         | 131 ± 25         | 128 ± 35         | 133 ± 32         |
| Triglycerides, mg/dL            | 72 [50-85]       | 81 [58-110]      | 118 [80-172]     | 103 [75-159]     |
| CRP, mg/dL                      | 0.06 [0.04-0.11] | 0.08 [0.06-0.21] | 0.11 [0.06-0.23] | 0.10 [0.06-0.17] |
| Glucose, mg/dL                  | 124 [101-175]    | 179 [135-225]    | 141 [118-172]    | 139 [118-169]    |
| Hemoglobin A1c, %               | 7.1 [6.5-7.5]    | 7.8 [7.1-8.4]    | 7.1 [6.5-7.8]    | 7.2 [6.7-8.1]    |
| C-peptide, ng/mL                | 0.15 [0.15-0.47] | 0.15 [0.06-0.21] | 1.75 [1.12-2.62] | 1.51 [1.13-2.45] |
| TNFR1, ng/mL                    | 1.34 [1.04-1.74] | 1.32 [1.06-2.10] | 1.74 [1.40-2.35] | 1.45 [1.16-1.97] |
| TNFR2, ng/mL                    | 3.10 [2.36-3.94] | 2.93 [2.43-4.61] | 3.67 [2.99-4.81] | 3.08 [2.52-4.28] |
| FABP4, ng/mL                    | 13.9 [8.2-16.1]  | 14.3 [9.6-21.8]  | 15.7 [10.6-22.3] | 18.9 [13.2-25.7] |

Variables are expressed as number (%), means ± standard deviation or medians [interquartile ranges].

ALT, alanine transaminase; AST, aspartate transaminase; BMI, body mass index; BP, blood pressure; BUN, blood urea nitrogen; CRP, C-reactive protein; DM, diabetes mellitus; DPP-4, dipeptidyl peptidase-4; eGFR, estimated glomerular filtration rate; FABP4, fatty acid-binding protein 4; GLP-1, glucagon-like peptide-1; γGTP, γ-glutamyl transpeptidase; HDL-C, high-density lipoprotein cholesterol; LDL-C, low-density lipoprotein cholesterol; SGLT2, sodium-glucose co-transporter-2; TC, total cholesterol; TNFR, tumor necrosis factor receptor; T1DM, type 1 diabetes mellitus; T2DM, type 2 diabetes mellitus.

## Supplementary Table S3

Supplementary Table S3. Correlation analyses for Log FABP4 in patients with DM divided by sex

|                      | T1DM     |       |          |        | T2DM      |        |           |        |
|----------------------|----------|-------|----------|--------|-----------|--------|-----------|--------|
|                      | Men      |       | Women    |        | Men       |        | Women     |        |
|                      | (n = 31) |       | (n = 45) |        | (n = 312) |        | (n = 263) |        |
|                      | r        | P     | r        | P      | r         | P      | r         | P      |
| Age                  | 0.089    | 0.632 | 0.018    | 0.905  | -0.027    | 0.636  | 0.030     | 0.625  |
| BMI                  | 0.081    | 0.677 | 0.526    | <0.001 | 0.277     | <0.001 | 0.331     | <0.001 |
| Systolic BP          | 0.385    | 0.033 | 0.086    | 0.573  | 0.034     | 0.545  | 0.073     | 0.237  |
| Diastolic BP         | 0.382    | 0.034 | -0.039   | 0.799  | 0.027     | 0.631  | 0.062     | 0.317  |
| Heart rate           | 0.301    | 0.099 | -0.275   | 0.067  | 0.085     | 0.136  | 0.034     | 0.584  |
| Log [Duration of DM] | -0.025   | 0.893 | 0.328    | 0.052  | 0.089     | 0.129  | 0.056     | 0.375  |
| Total protein        | -0.161   | 0.386 | -0.081   | 0.599  | -0.016    | 0.778  | -0.087    | 0.160  |
| Log AST              | 0.392    | 0.029 | 0.277    | 0.065  | 0.039     | 0.492  | 0.057     | 0.357  |
| Log ALT              | 0.410    | 0.022 | 0.268    | 0.075  | 0.079     | 0.164  | 0.077     | 0.212  |
| Log $\gamma$ GTP     | 0.459    | 0.009 | 0.322    | 0.031  | 0.088     | 0.120  | 0.120     | 0.051  |
| BUN                  | 0.043    | 0.817 | 0.649    | <0.001 | 0.200     | <0.001 | 0.344     | <0.001 |
| Log Creatinine       | -0.013   | 0.946 | 0.696    | <0.001 | 0.389     | <0.001 | 0.414     | <0.001 |
| eGFR                 | -0.068   | 0.718 | -0.640   | <0.001 | -0.319    | <0.001 | -0.343    | <0.001 |
| Uric acid            | 0.158    | 0.394 | 0.329    | 0.026  | 0.259     | <0.001 | 0.273     | <0.001 |
| TC                   | -0.037   | 0.846 | -0.005   | 0.975  | 0.039     | 0.494  | -0.105    | 0.089  |
| LDL-C                | 0.072    | 0.702 | -0.067   | 0.664  | 0.019     | 0.740  | -0.065    | 0.296  |
| HDL-C                | -0.275   | 0.134 | -0.109   | 0.478  | -0.078    | 0.165  | -0.269    | <0.001 |
| Non-HDL-C            | 0.126    | 0.498 | 0.069    | 0.652  | 0.072     | 0.205  | -0.001    | 0.994  |
| Log Triglycerides    | 0.333    | 0.067 | 0.309    | 0.039  | 0.135     | 0.017  | 0.158     | 0.010  |
| Log CRP              | 0.083    | 0.656 | 0.187    | 0.224  | 0.143     | 0.011  | 0.109     | 0.079  |
| Log Glucose          | -0.055   | 0.770 | 0.067    | 0.666  | 0.014     | 0.800  | -0.056    | 0.362  |
| Log [Hemoglobin A1c] | -0.195   | 0.294 | 0.290    | 0.054  | 0.071     | 0.214  | 0.039     | 0.530  |
| Log C-peptide        | 0.165    | 0.374 | 0.164    | 0.280  | 0.186     | <0.001 | 0.245     | <0.001 |
| Log TNFR1            | 0.330    | 0.070 | 0.546    | <0.001 | 0.394     | <0.001 | 0.607     | <0.001 |
| Log TNFR2            | 0.347    | 0.056 | 0.578    | <0.001 | 0.350     | <0.001 | 0.423     | <0.001 |

ALT, alanine transaminase; AST, aspartate transaminase; BMI, body mass index; BP, blood pressure; BUN, blood urea nitrogen; CRP, C-reactive protein; DM, diabetes mellitus; eGFR, estimated glomerular filtration rate; FABP4, fatty acid-binding protein 4;  $\gamma$ GTP,  $\gamma$ -glutamyl transpeptidase; HDL-C, high-density lipoprotein cholesterol; LDL-C, low-density lipoprotein cholesterol; TC, total cholesterol; TNFR, tumor necrosis factor receptor; T1DM, type 1 diabetes mellitus; T2DM, type 2 diabetes mellitus.

## Supplementary Table S4

Supplementary Table S4. Additional multivariable regression analyses for Log FABP4 in patients with DM

|                                       | T1DM (n = 76) |       |         |       | T2DM (n = 575) |        |         |        |
|---------------------------------------|---------------|-------|---------|-------|----------------|--------|---------|--------|
|                                       | Model 3       |       | Model 4 |       | Model 3        |        | Model 4 |        |
|                                       | $\beta$       | P     | $\beta$ | P     | $\beta$        | P      | $\beta$ | P      |
| Age                                   | -0.052        | 0.688 | -0.073  | 0.569 | -0.110         | 0.016  | -0.124  | 0.007  |
| Sex (Men)                             | -0.097        | 0.364 | -0.090  | 0.401 | -0.235         | <0.001 | -0.235  | <0.001 |
| BMI                                   | 0.363         | 0.006 | 0.366   | 0.006 | 0.281          | <0.001 | 0.287   | <0.001 |
| eGFR                                  | -0.191        | 0.295 | -0.241  | 0.143 | -0.251         | <0.001 | -0.284  | <0.001 |
| Log Triglycerides                     | 0.101         | 0.398 | 0.136   | 0.231 | 0.010          | 0.789  | 0.014   | 0.713  |
| Current smoking habit                 | -0.004        | 0.970 | -0.006  | 0.952 | 0.032          | 0.410  | 0.044   | 0.257  |
| Insulin                               | -             | -     | -       | -     | 0.056          | 0.175  | 0.065   | 0.115  |
| GLP-1 analogs                         | -0.096        | 0.372 | -0.106  | 0.332 | -0.032         | 0.406  | -0.032  | 0.433  |
| Sulfonylureas                         | -             | -     | -       | -     | 0.061          | 0.154  | 0.063   | 0.146  |
| Biguanides                            | -0.080        | 0.502 | -0.076  | 0.524 | 0.022          | 0.589  | 0.013   | 0.760  |
| $\alpha$ -glucosidase inhibitors      | 0.098         | 0.335 | 0.095   | 0.349 | 0.008          | 0.825  | 0.001   | 0.969  |
| DPP-4 inhibitors                      | 0.210         | 0.183 | 0.106   | 0.372 | 0.069          | 0.083  | 0.069   | 0.084  |
| Glinides                              | -             | -     | -       | -     | -0.076         | 0.039  | -0.075  | 0.042  |
| SGLT2 inhibitors                      | -             | -     | -       | -     | 0.033          | 0.362  | 0.038   | 0.296  |
| Log TNFR1                             | 0.210         | 0.183 | -       | -     | 0.277          | <0.001 | -       | -      |
| Log TNFR2                             | -             | -     | 0.170   | 0.225 | -              | -      | 0.239   | <0.001 |
| AIC                                   | 100           |       | 100     |       | 723            |        | 729     |        |
| R <sup>2</sup>                        | 0.443         |       | 0.440   |       | 0.326          |        | 0.319   |        |
| Adjusted R <sup>2</sup>               | 0.342         |       | 0.339   |       | 0.308          |        | 0.301   |        |
| Statistical power (1 - $\beta$ error) | 0.991         |       | 0.990   |       | 1.000          |        | 1.000   |        |

AIC, Akaike's information criterion;  $\beta$ , standardized regression coefficient; BMI, body mass index; DPP-4, dipeptidyl peptidase-4; eGFR, estimated glomerular filtration rate; FABP4, fatty acid-binding protein 4; SGLT2, sodium-glucose co-transporter-2; TNFR, tumor necrosis factor receptor; T1DM, type 1 diabetes mellitus; T2DM, type 2 diabetes mellitus.

## Supplementary Table S5

Supplementary Table S5. Multivariable regression analyses for Log FABP4 in patients with DM

|                                       | T1DM (n = 76) |       |         |       | T2DM (n = 575) |        |         |        |
|---------------------------------------|---------------|-------|---------|-------|----------------|--------|---------|--------|
|                                       | Model 5       |       | Model 6 |       | Model 5        |        | Model 6 |        |
|                                       | $\beta$       | P     | $\beta$ | P     | $\beta$        | P      | $\beta$ | P      |
| Age                                   | -0.614        | 0.207 | -0.192  | 0.312 | -0.102         | 0.022  | -0.122  | 0.007  |
| Sex (Men)                             | -0.137        | 0.182 | -0.126  | 0.219 | -0.227         | <0.001 | -0.215  | <0.001 |
| BMI                                   | 0.180         | 0.134 | 0.181   | 0.132 | 0.284          | <0.001 | 0.288   | <0.001 |
| eGFR                                  | -0.305        | 0.077 | -0.361  | 0.020 | -0.221         | <0.001 | -0.261  | <0.001 |
| Log Triglycerides                     | 0.175         | 0.156 | 0.183   | 0.140 | 0.012          | 0.754  | 0.015   | 0.710  |
| Log Glucose                           | 0.020         | 0.851 | 0.017   | 0.875 | -0.037         | 0.324  | -0.031  | 0.411  |
| Log CRP                               | -0.214        | 0.086 | -0.203  | 0.099 | 0.014          | 0.178  | -0.008  | 0.847  |
| Cardiovascular disease                | 0.121         | 0.257 | 0.114   | 0.286 | -0.005         | 0.890  | 0.001   | 0.977  |
| Statin                                | 0.099         | 0.345 | 0.105   | 0.318 | 0.016          | 0.662  | 0.012   | 0.753  |
| Log TNFR1                             | 0.326         | 0.053 | -       | -     | 0.293          | <0.001 | -       | -      |
| Log TNFR2                             | -             | -     | 0.281   | 0.057 | -              | -      | 0.253   | <0.001 |
| AIC                                   | 103           |       | 103     |       | 742            |        | 749     |        |
| R <sup>2</sup>                        | 0.464         |       | 0.463   |       | 0.305          |        | 0.296   |        |
| Adjusted R <sup>2</sup>               | 0.380         |       | 0.379   |       | 0.293          |        | 0.284   |        |
| Statistical power (1 - $\beta$ error) | 0.998         |       | 0.998   |       | 1.000          |        | 1.000   |        |

AIC, Akaike's information criterion;  $\beta$ , standardized regression coefficient; BMI, body mass index; CRP, C-reactive protein; eGFR, estimated glomerular filtration rate; FABP4, fatty acid-binding protein 4; TNFR, tumor necrosis factor receptor; T1DM, type 1 diabetes mellitus; T2DM, type 2 diabetes mellitus.
